# Supplementary material
Source: Springer Nature journal article supplement (https://www.springermedizin.de/resource/supplementary/12916_2014_987_MOESM9_ESM.pdf/9598962)

**Supplemental Figure 8. All Evidence network: Progression-free survival hazard ratio over time for each treatment group relative to tamoxifen as obtained with random effects Weibull network meta-analysis model with time varying hazard ratios and no covariates (up to 40 months)**

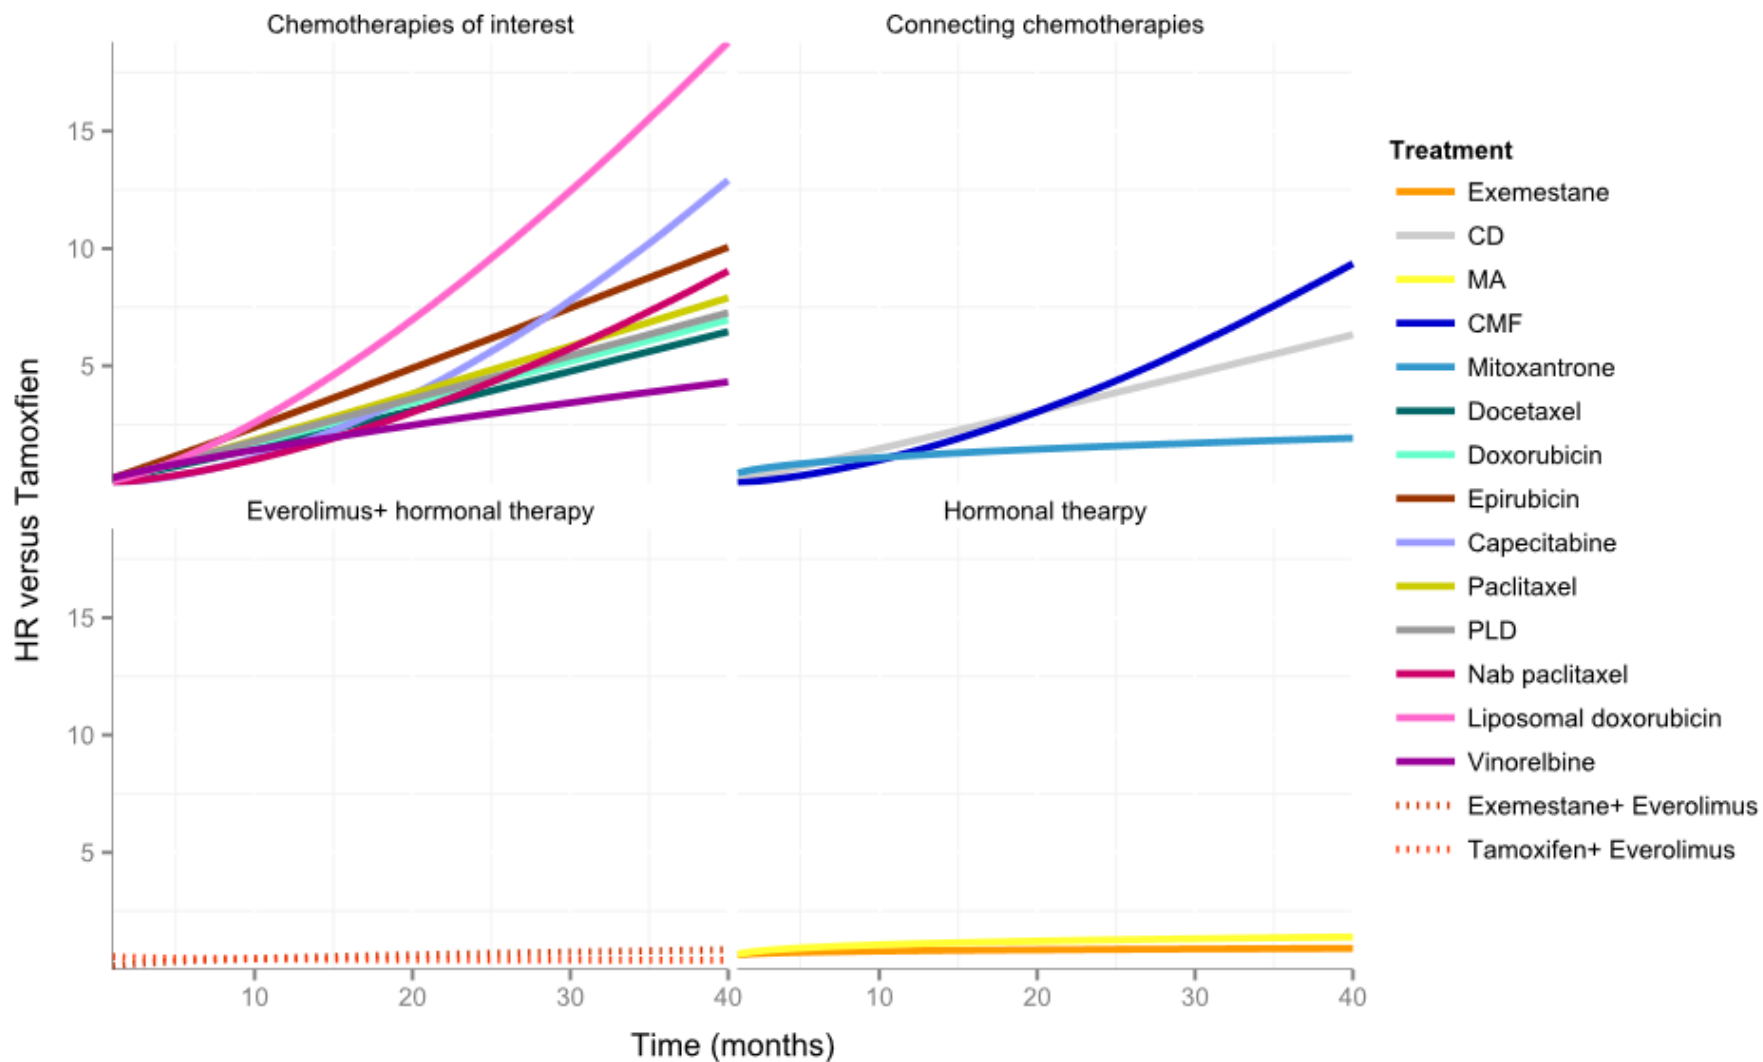

Supplement: MOESM9 [file 9598962]
